# Supplementary material for: A Novel Trichomonas vaginalis Surface Protein Modulates Parasite Attachment via Protein:Host Cell Proteoglycan Interaction
Source: PubMed Central journal article supplement (PMC7885099; doi:10.1128/mbio.03374-20), 2021-02-09
Supplement: mBio.03374-20-sf002.pdf [file mBio.03374-20-sf002.pdf]

A

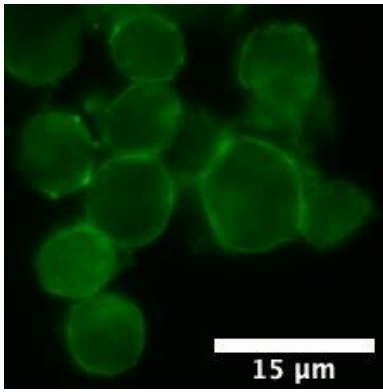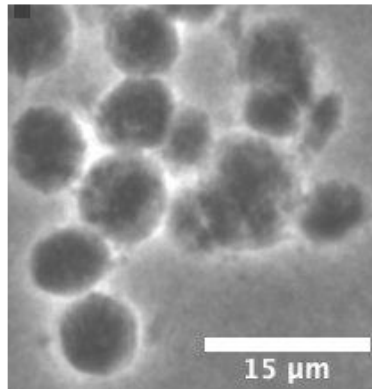

B

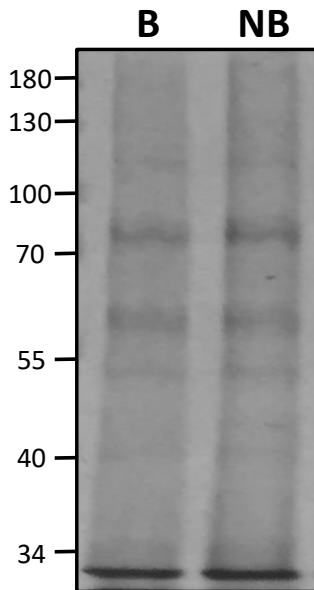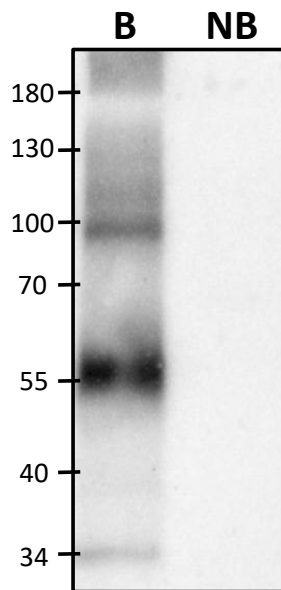

Fig. S2
